# Supplementary figures and images for: Whole blood transcriptome analysis reveals footprints of cattle adaptation to sub‐arctic conditions
Source: PubMed Central journal article supplement — Anim Genet. 2019 Apr 7;50(3):217–27. doi: 10.1111/age.12783 (PMC6593690; doi:10.1111/age.12783), 2019-04-07

**Figure S2** Illustration of closely located Granzyme B in the genome

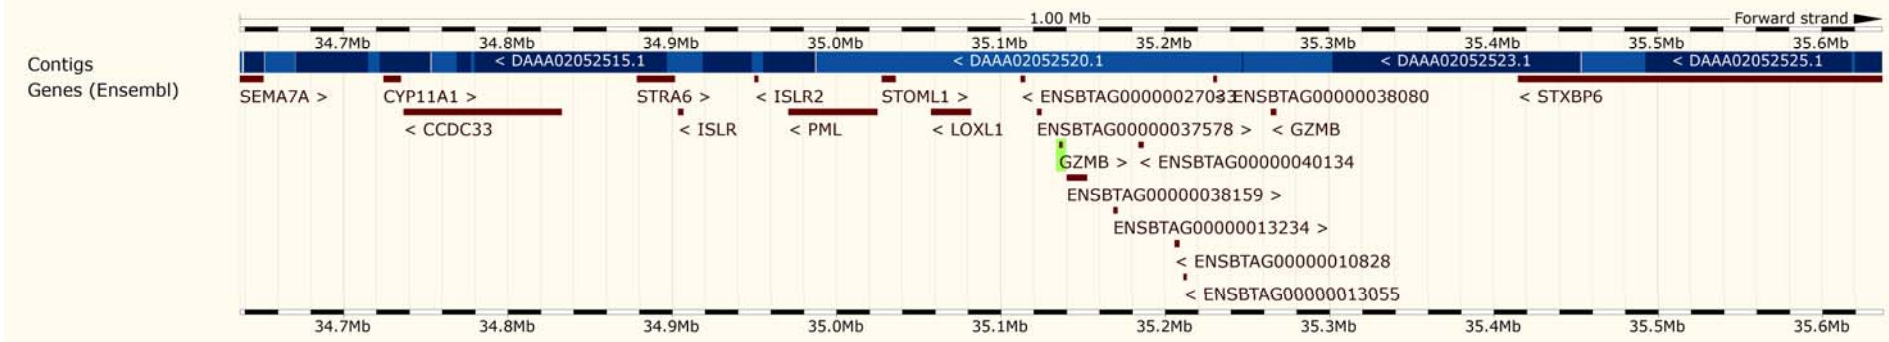

Supplement: AGE-50-217-s002.pdf [file AGE-50-217-s002.pdf]
